# Supplementary material
Source: publisher figshare collection journal article supplement (https://acs.figshare.com/ndownloader/files/4709653)
Supplement: Supplementary file 1 [file 4709653]

### Figure caption (for Supporting Information)

**Figure 1S.** Infrared absorption spectra in the frequency regions of (a) D<sub>2</sub>O symmetric stretching, (b) D<sub>2</sub>O asymmetric stretching, and (c) HDO symmetric stretching. These spectra were obtained for the sample of O<sub>3</sub>/(H<sub>2</sub>O+D<sub>2</sub>O+HDO)/Ne=8/2/4000. Spectra were recorded at 6K with a spectral resolution of 0.25 cm<sup>-1</sup>. Arrows indicate the band observed only for the ozone-containing sample. The band positions of non-rotating water monomers (NRMs) are also indicated by dotted lines.

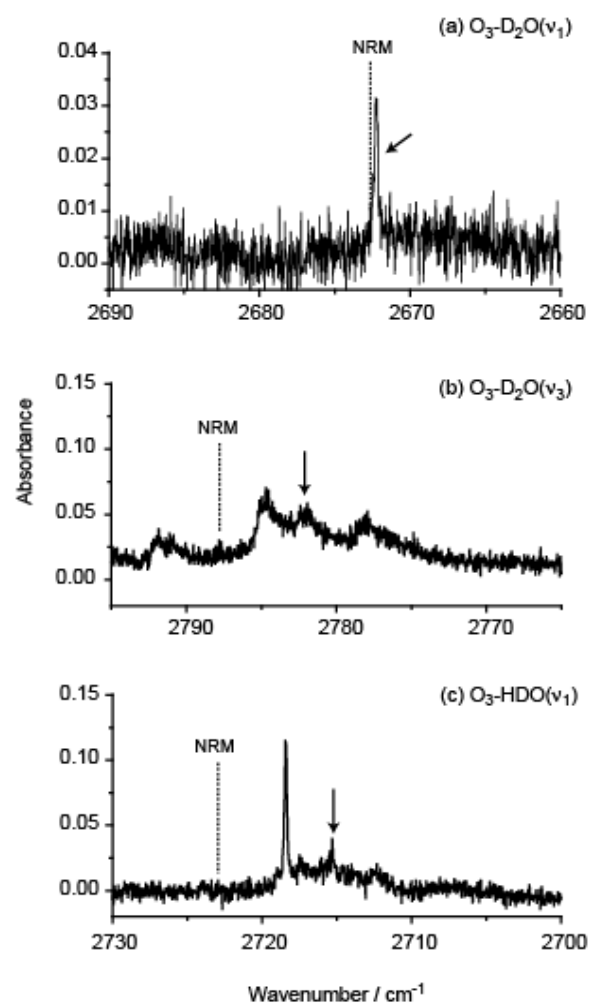

Figure 1S Tsuge et al.
